# Supplementary material for: Mathematical Modeling Predicts that Increased HSV-2 Shedding in HIV-1 Infected Persons Is Due to Poor Immunologic Control in Ganglia and Genital Mucosa
Source: PubMed Central journal article supplement (PMC4902308; doi:10.1371/journal.pone.0155124), 2016-06-10

S6

a

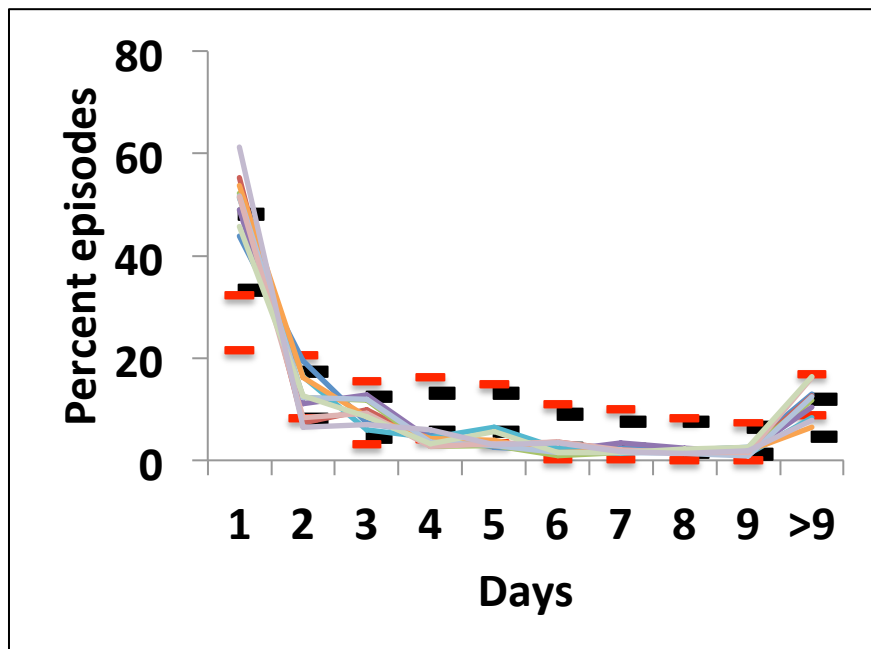

b

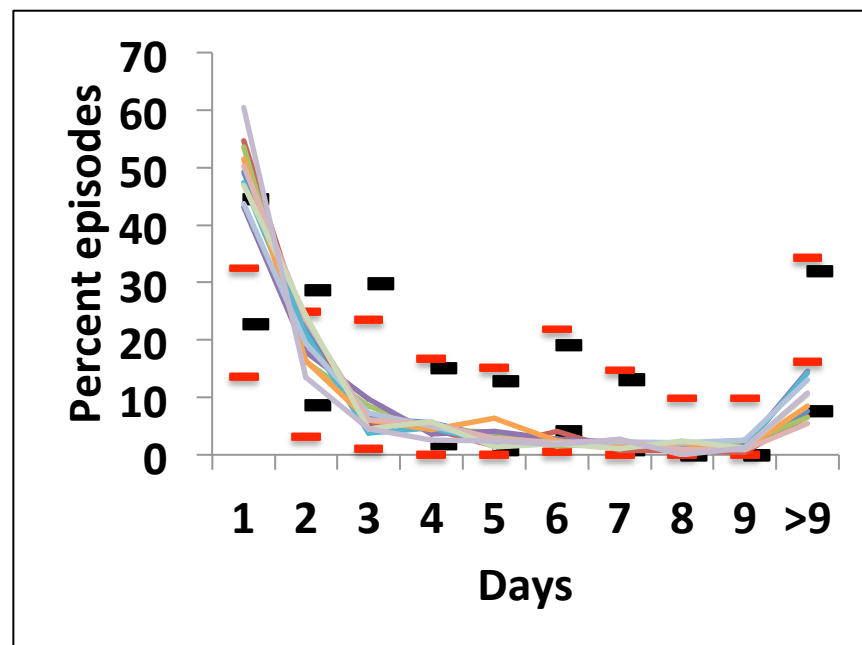

c

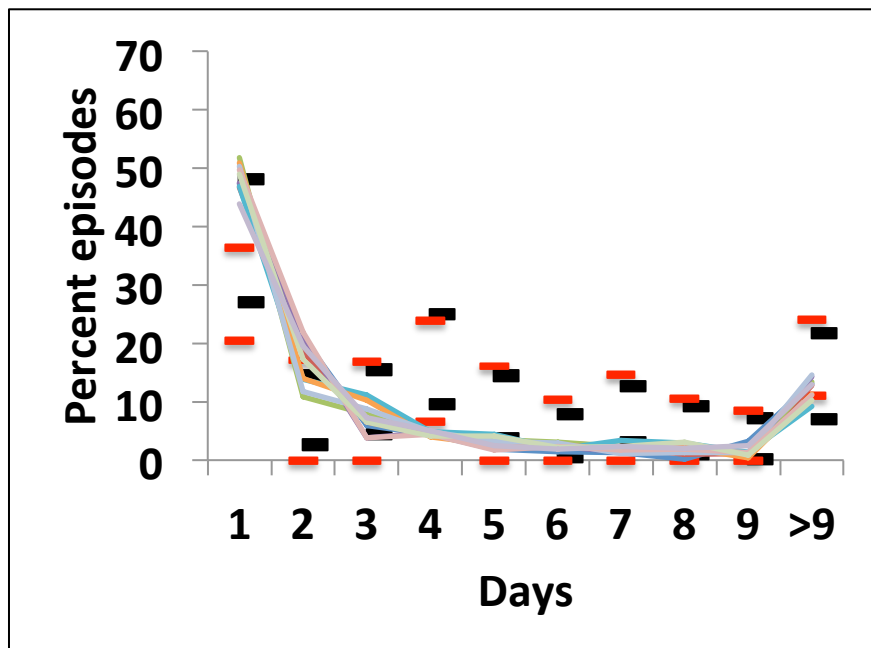

d

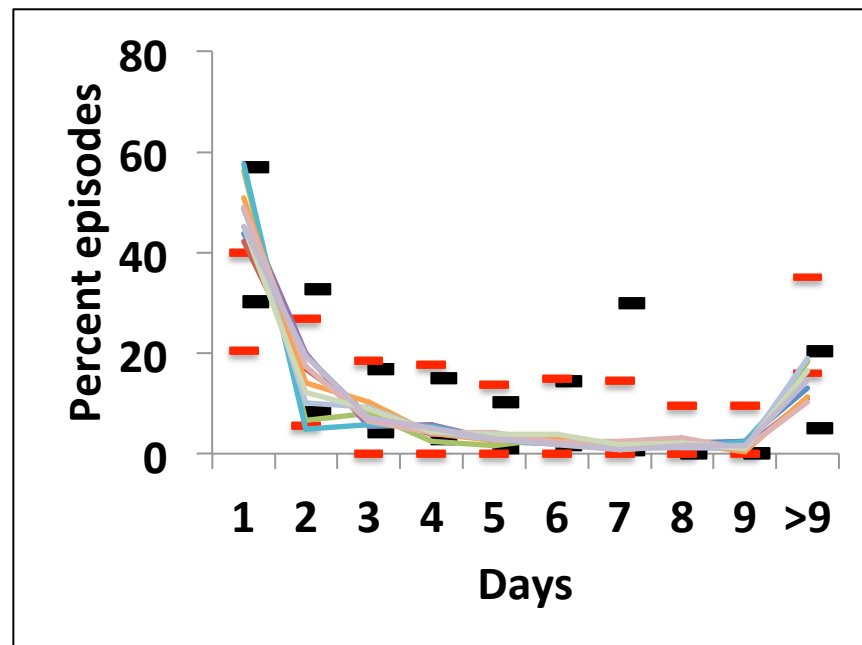

Supplement: pone.0155124.s009.pdf [file pone.0155124.s009.pdf]
